# Supplementary material for: Enhanced electrochemical performance of NiSbS/NiSb/NiS nanocomposites anchored on graphite nanosheets for sodium-ion battery applications
Source: Royal Society of Chemistry journal article supplement (doi:10.1039/d4ta07323a), 2024-11-15
Supplement: d4ta07323a1.pdf [file d4ta07323a1.pdf]

## Supporting Information for

# Enhanced Electrochemical Performance of NiSbS/NiSb/NiS Nanocomposites Anchored on Graphite Nanosheets for Sodium-Ion Battery Applications

Shandong Huang<sup>a</sup>, Dong Feng<sup>b, c\*</sup>, Yuanzhi Zhu<sup>b</sup>, Yihong Ding<sup>a\*</sup>, Delong Xie<sup>b, c</sup>, Yi Mei<sup>b, c</sup>, Tianbiao Zeng<sup>a\*</sup>

a. Key Laboratory of Carbon Materials of Zhejiang Province, Wenzhou Key Lab of Advanced Energy Storage and Conversion, Zhejiang Province Key Lab of Leather Engineering, College of Chemistry and Materials Engineering, Wenzhou University, Wenzhou, Zhejiang 325035, China

b. Yunnan Provincial Key Laboratory of Energy Saving in Phosphorus Chemical Engineering and New Phosphorus Materials, Faculty of Chemical Engineering, Kunming University of Science and Technology, Kunming 650500, China

c. The International Joint Laboratory for Sustainable Polymers of Yunnan Province, Kunming 650500, China

\*: Corresponding author: [fdryan@kust.edu.cn](mailto:fdryan@kust.edu.cn) (D. Feng), [yhdd@wzu.edu.cn](mailto:yhdd@wzu.edu.cn) (Y. Ding) [tianbiaozeng@126.com](mailto:tianbiaozeng@126.com) (T. Zeng)

**Table S1** The final energy/atom of some reactants.

|                |                   |                                |                                |                                 |
|----------------|-------------------|--------------------------------|--------------------------------|---------------------------------|
| Materials      | Ni                | Sb <sub>2</sub> S <sub>3</sub> | NiSbS                          | NiSb                            |
| Crystal ID     | mp-23             | mp-2809                        | mp-3679                        | mp-810                          |
| Energy eV/atom | -5.7798           | -4.3828                        | -4.9969                        | -5.2253                         |
| Materials      | NiS               | NiS <sub>2</sub>               | Ni <sub>3</sub> S <sub>4</sub> | Ni <sub>3</sub> S <sub>2</sub>  |
| Crystal ID     | mp-1547           | mp-1180046                     | mp-1050                        | mp-362                          |
| Energy eV/atom | -5.3168           | -4.9412                        | -5.2125                        | -5.4933                         |
| Materials      | NiSb <sub>2</sub> | Sb                             | Ni <sub>3</sub> Sb             | Ni <sub>5</sub> Sb <sub>2</sub> |
| Crystal ID     | mp-19895          | mp-104                         | mp-672371                      | mp-2409                         |
| Energy eV/atom | -4.8767           | -4.129                         | -5.5154                        | -5.4786                         |
| Materials      | Na <sub>2</sub> S | Na <sub>3</sub> Sb             | Na                             | S                               |
| Crystal ID     | mp-648            | mp-7956                        | mp-10172                       | mp-96                           |
| Energy eV/atom | -3.3241           | -2.4524                        | -1.3122                        | -4.1364                         |

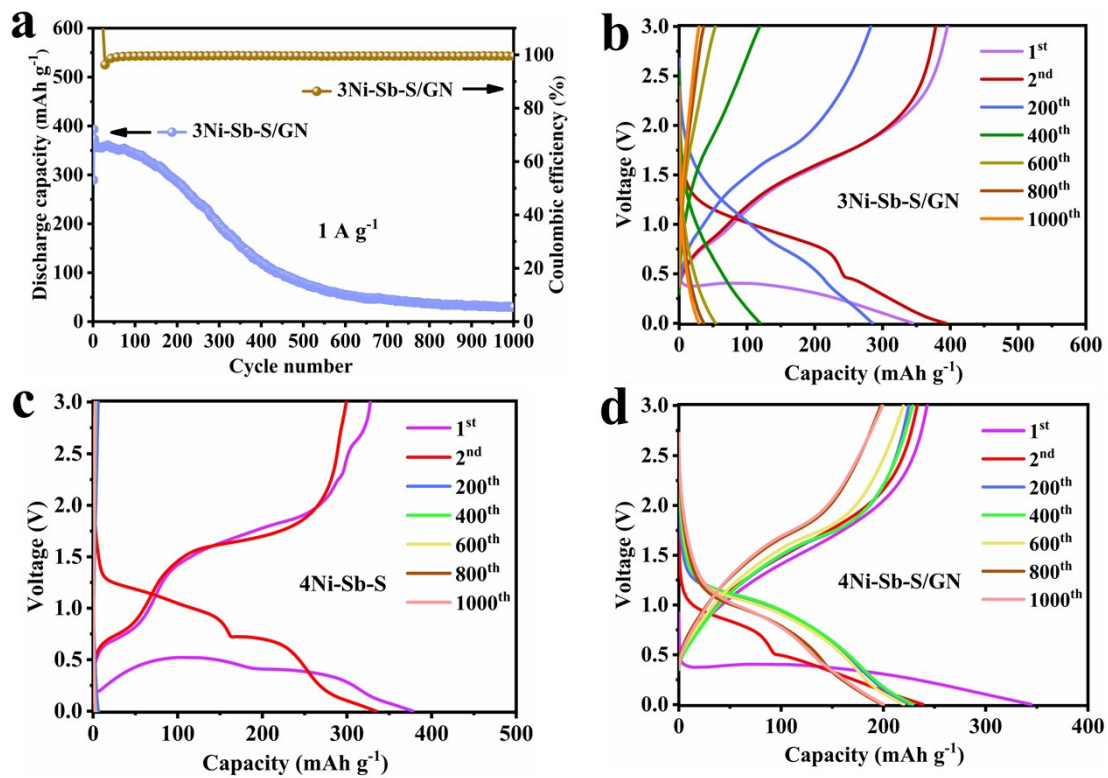

**Fig. S1.** (a) Cycling stability of 3Ni-Sb-S/GN at a current density of 1.0 A g<sup>-1</sup>; Discharge/charge profiles of (b) 3Ni-Sb-S/GN, (c) 4Ni-Sb-S and (d) 4Ni-Sb-S/GN at a current density of 1.0 A g<sup>-1</sup>.

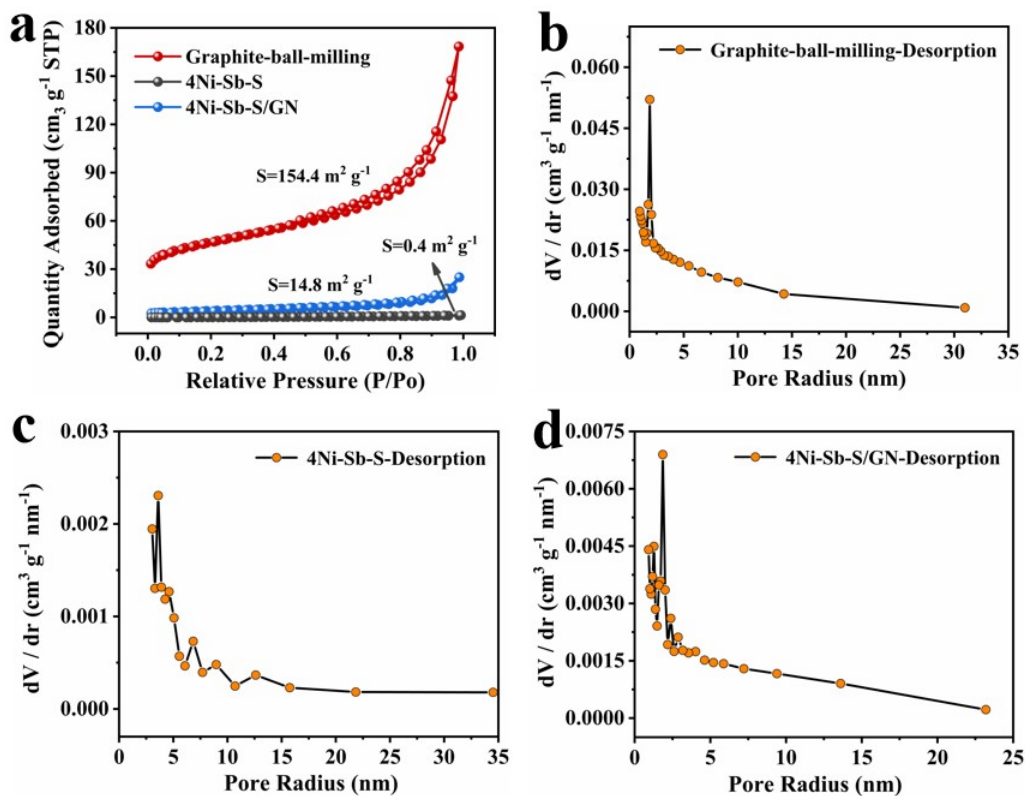

**Fig. S2.** Nitrogen adsorption isotherms of Graphite-ball-milling, 4Ni-Sb-S, and 4Ni-Sb-S/GN (a); Corresponding pore size distribution of (b) Graphite-ball-milling, (c) 4Ni-Sb-S, and (d) 4Ni-Sb-S/GN.

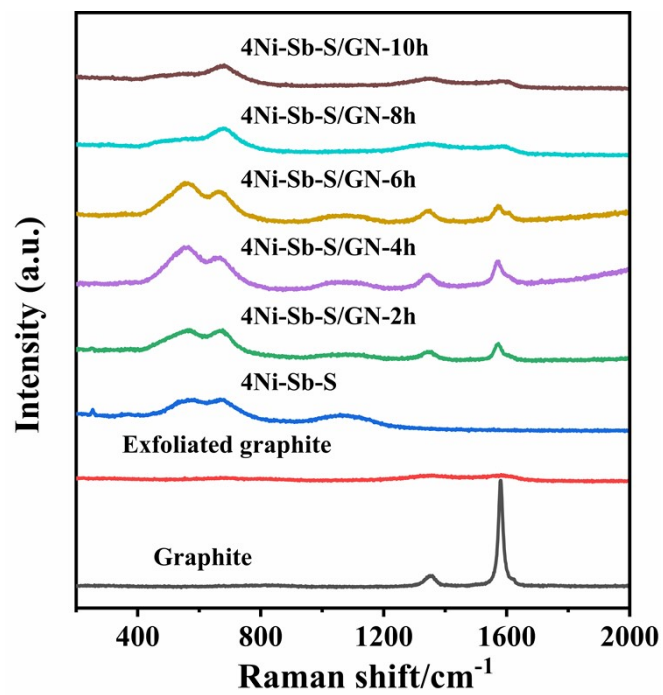

**Fig. S3.** Raman patterns of Graphite, Exfoliated graphite, 4Ni-Sb-S, and 4Ni-Sb-S/GN at different milling times.

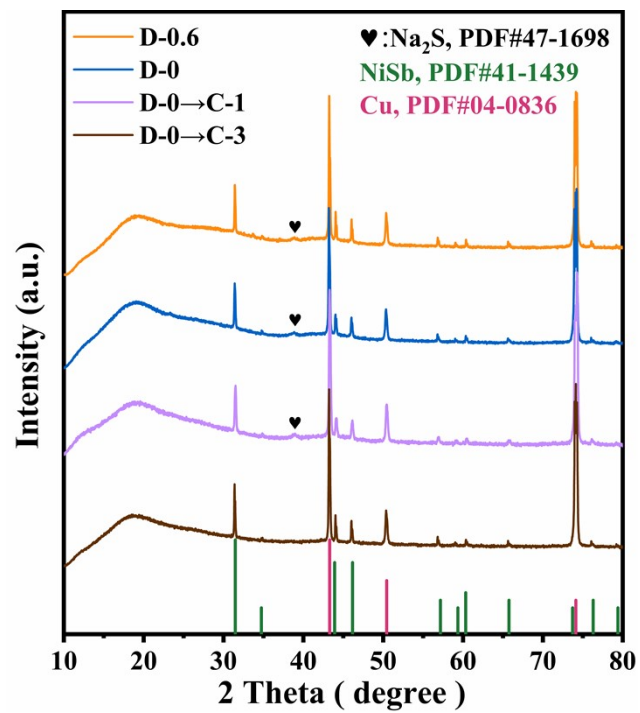

**Fig. S4.** *Ex-situ* XRD patterns of Ni-Sb-S during the discharge/charge processes.

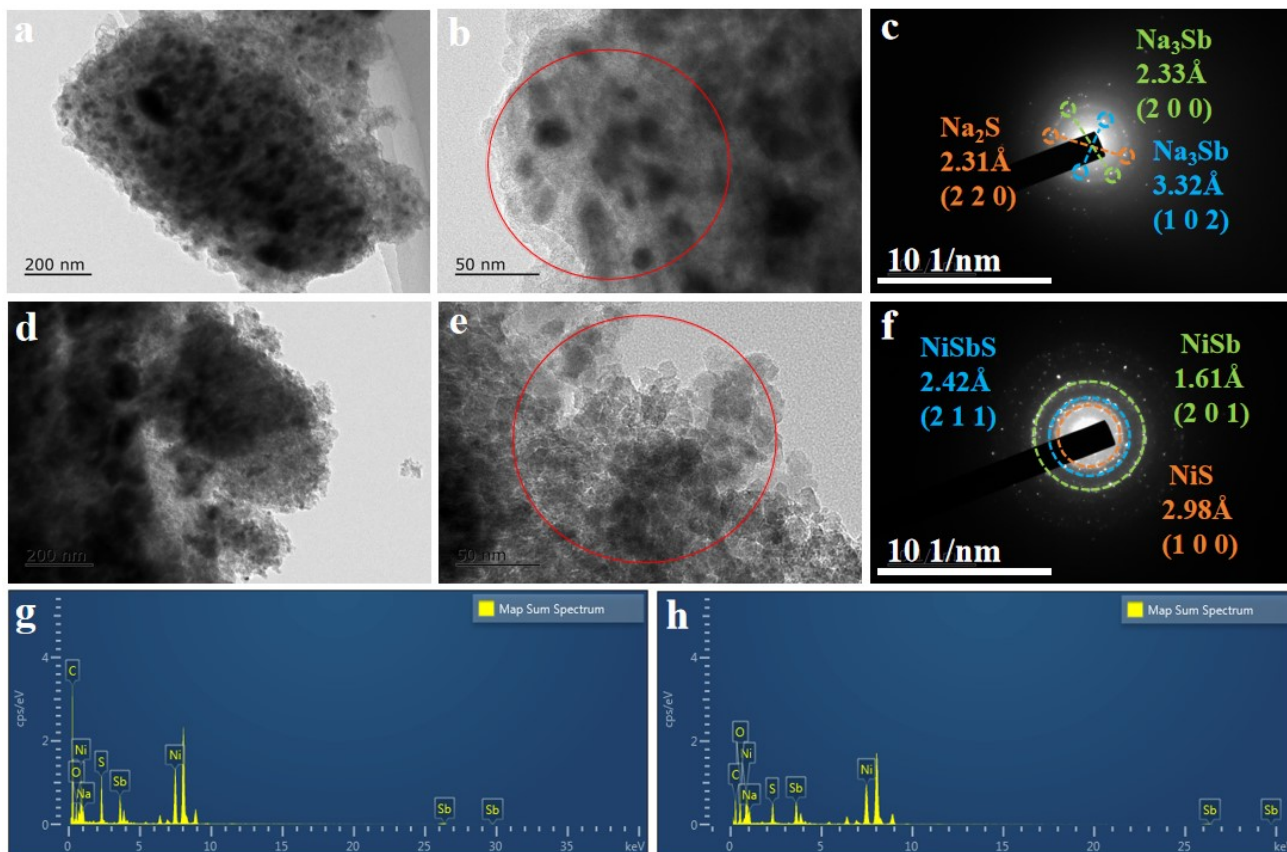

**Fig. S5.** (a, b) Supplemented TEM image of Ni-Sb-S/GN electrode after discharging to 0V; (c) SAED images of Ni-Sb-S/GN in image (b); (d, e) supplemented TEM images of Ni-Sb-S/GN after discharging to 0V followed by charging to 3V; (f) SAED images of Ni-Sb-S/GN in image (e). (g) The elementary distributions of image (b); (h) The elementary distributions of image (e).

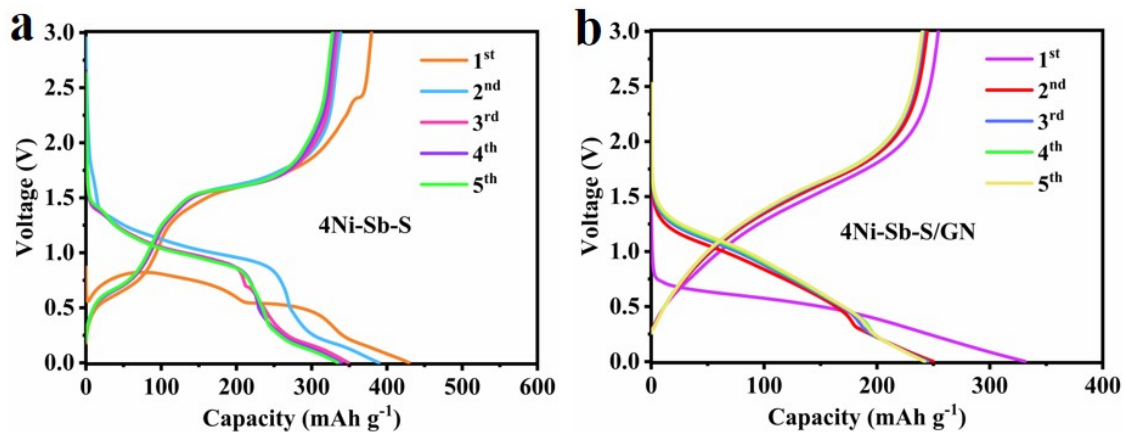

**Fig. S6.** Discharge/charge profiles of (a) 4Ni-Sb-S and (b) 4Ni-Sb-S/GN.

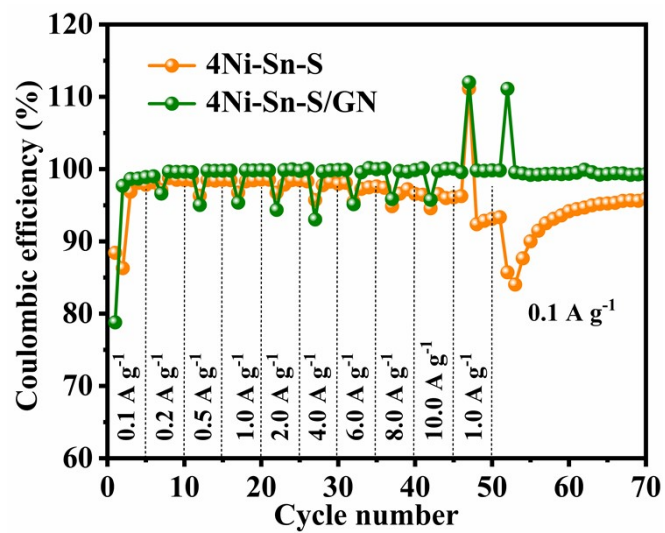

**Fig. S7.** Coulombic efficiency of 4Ni-Sb-S and 4Ni-Sb-SGN tested from 0.1~10.0  $A g^{-1}$ .



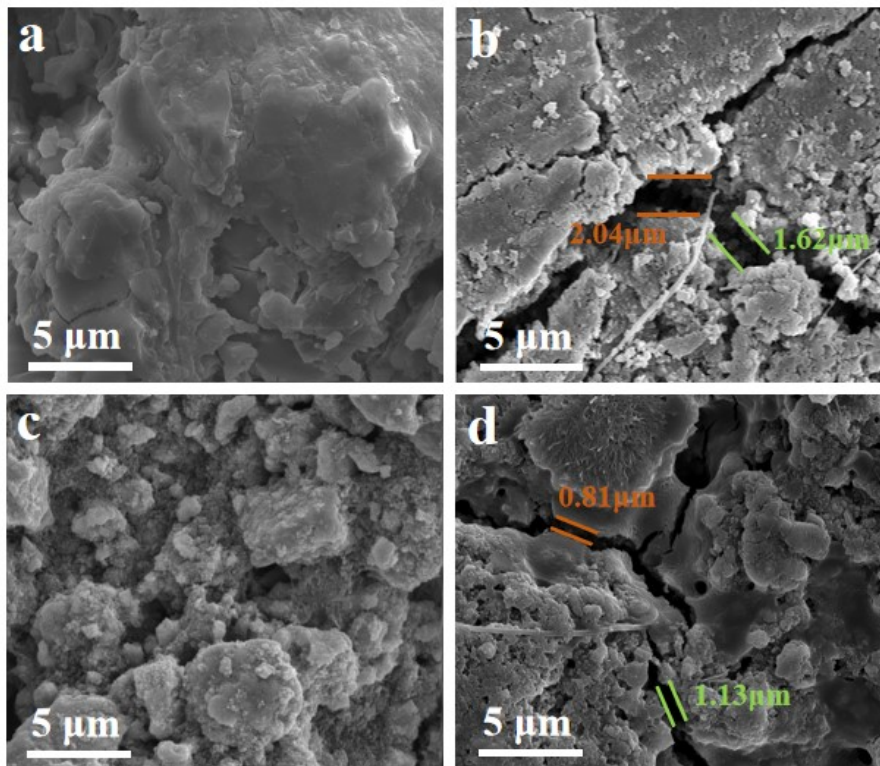

**Fig. S8.** SEM images of (a, b) Ni-Sb-S, and (c,d) Ni-Sb-S/GN before and after 1000 cycles at 1.0 A g<sup>-1</sup>.

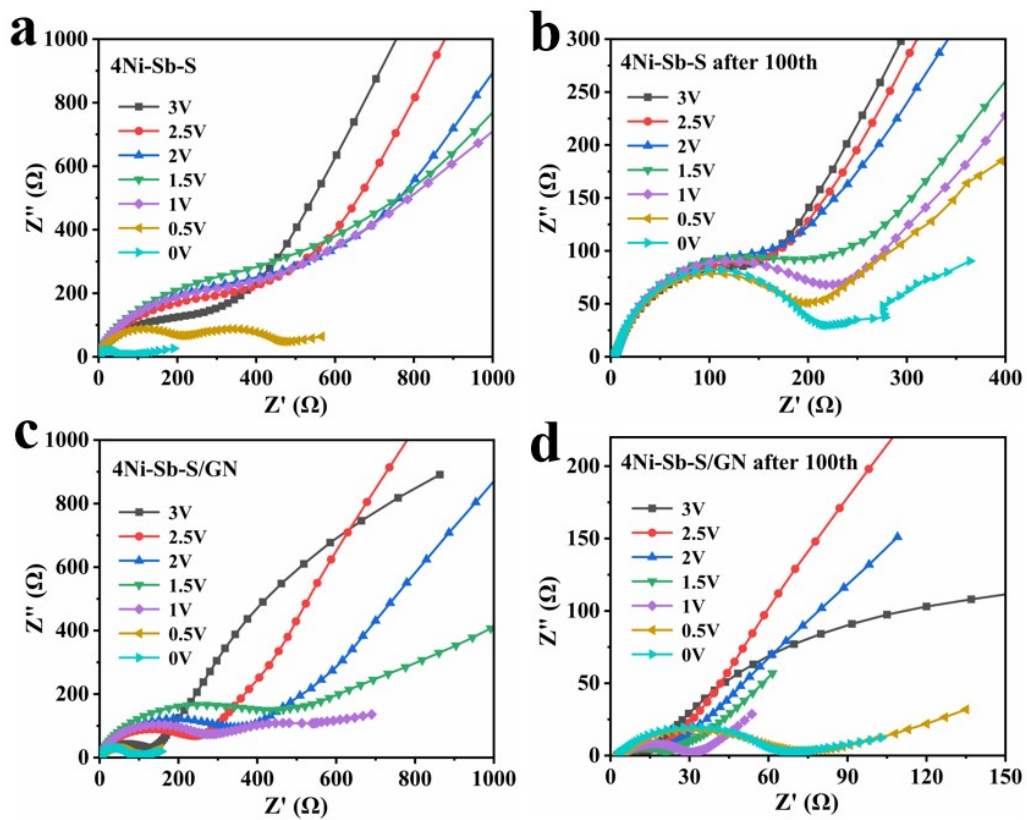

**Fig. S9.** Nyquist plots of the bare 4Ni-Sb-S, and 4Ni-Sb-S/GN electrodes before(a, c) and after cycling 100 cycles(b, d).

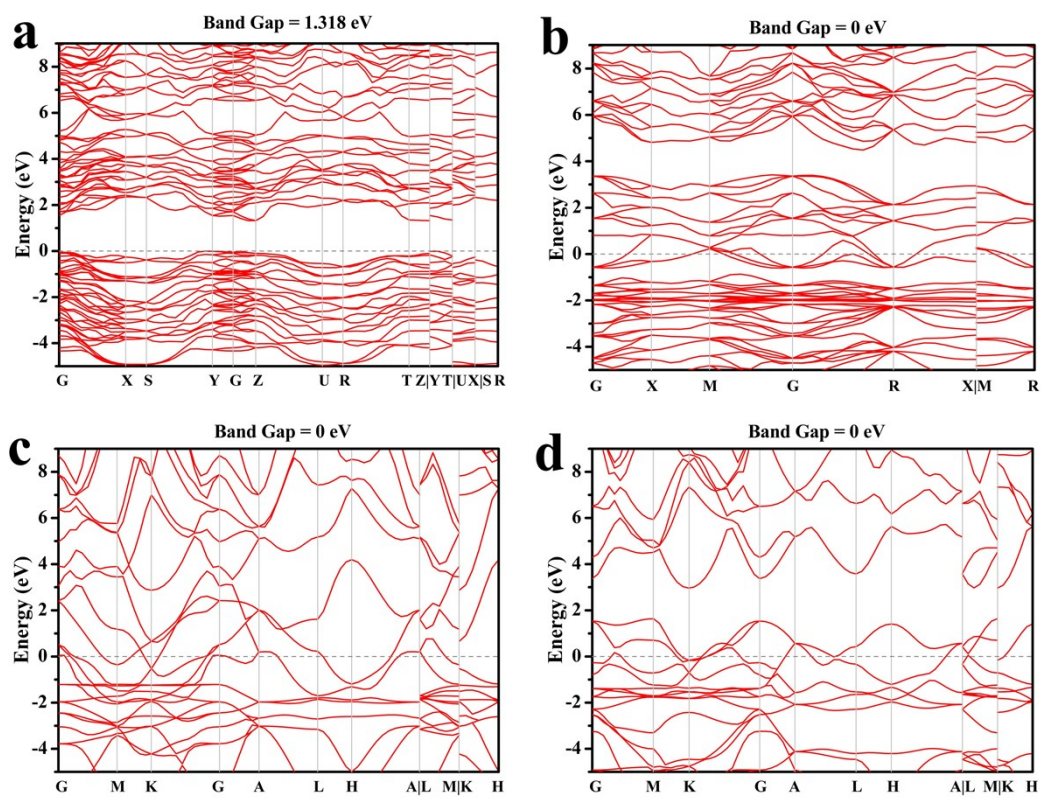

**Fig. S10.** Band gap values of (a) Sb<sub>2</sub>S<sub>3</sub>, (b) NiSbS, (c) NiSb, and (d) NiS.

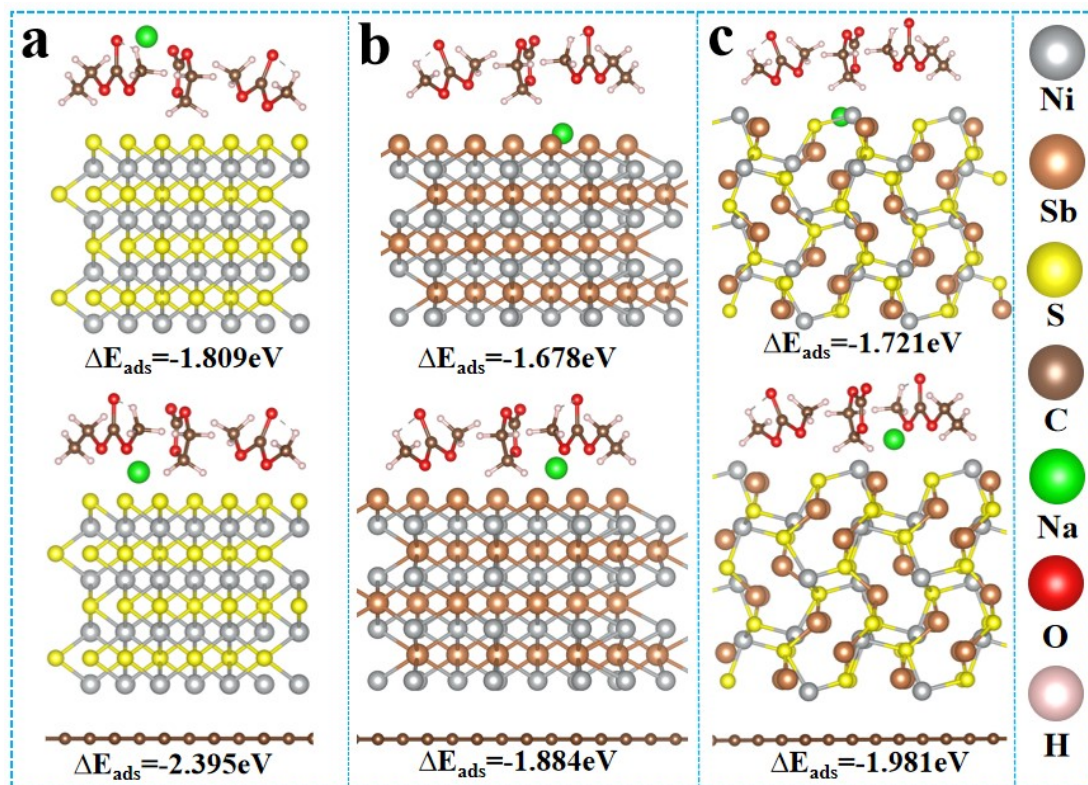

**Fig. S11.** Adsorption models and energies of adding (EC:DMC:EMC) (a) NiS, NiS/GN, (b) NiSb, NiSb/GN, and (c) NiSbS, NiSbS/GN.

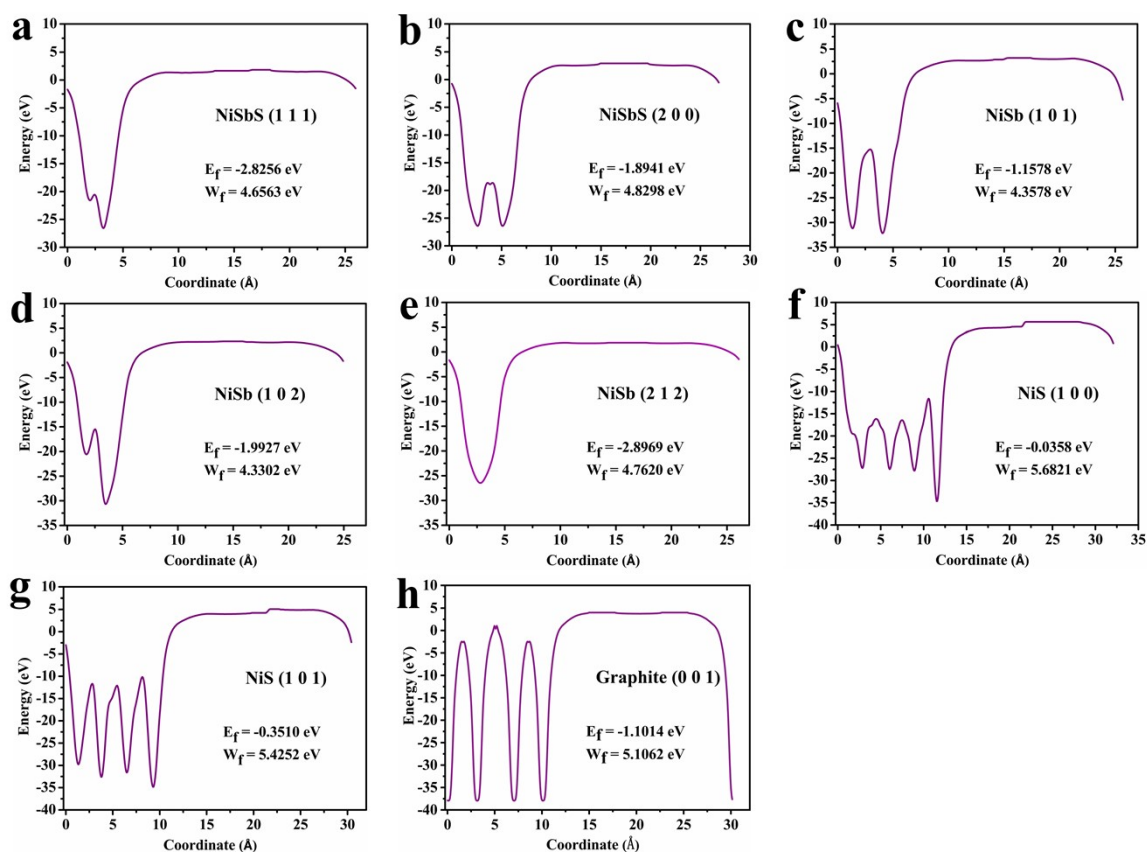

**Fig. S12.** The work functions of Graphite, NiSbS, NiSb, and NiS based on the observed lattice planes (*i.e.*, (0 0 1) of Graphite; (1 1 1) and (2 0 0) of NiSbS; (1 0 1), (1 0 2), and (2 1 2) of NiSb; (1 0 0) and (1 0 1) of NiS).

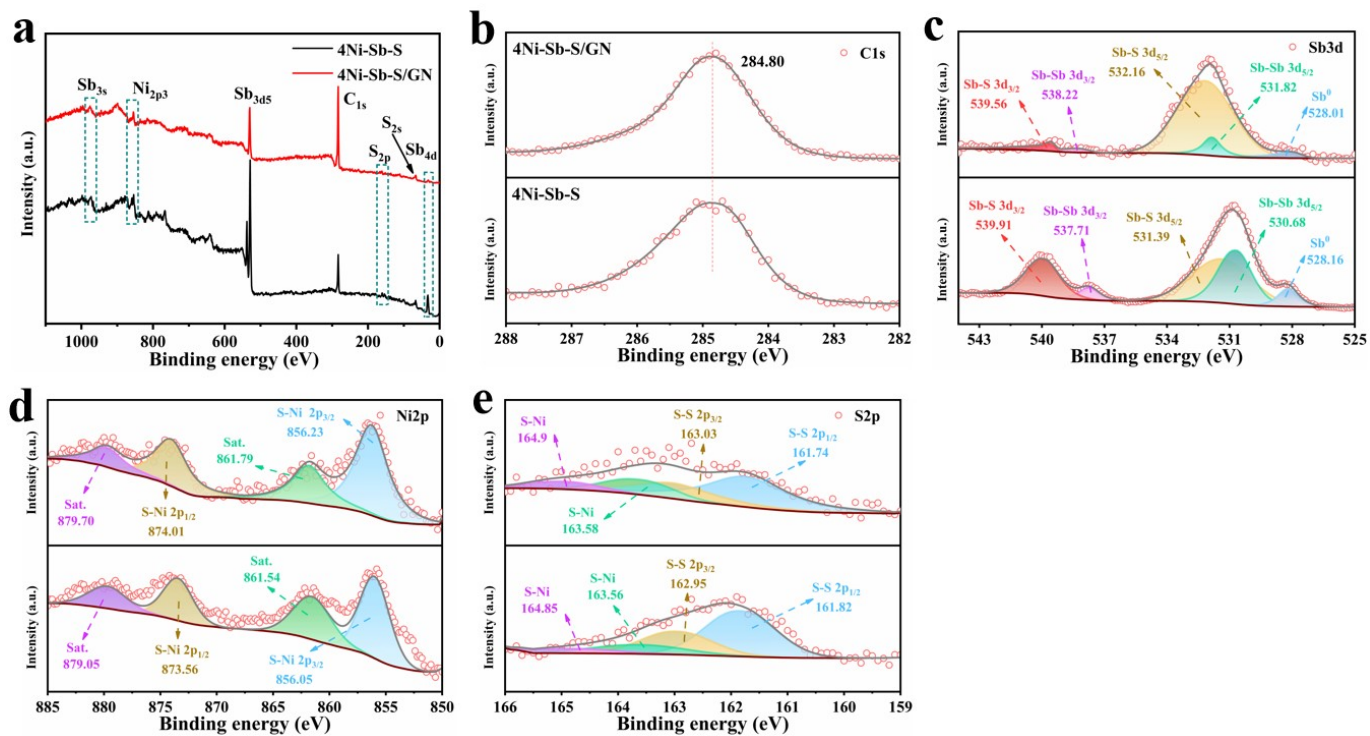

**Fig. S13.** The XPS spectra of 4Ni-Sb-S and 4Ni-Sb-S/GN. (a) survey spectra, (b) C 1s spectra, (c) Sb 3d spectra, (d) Ni 2p spectra, and (e) S 2p spectra.

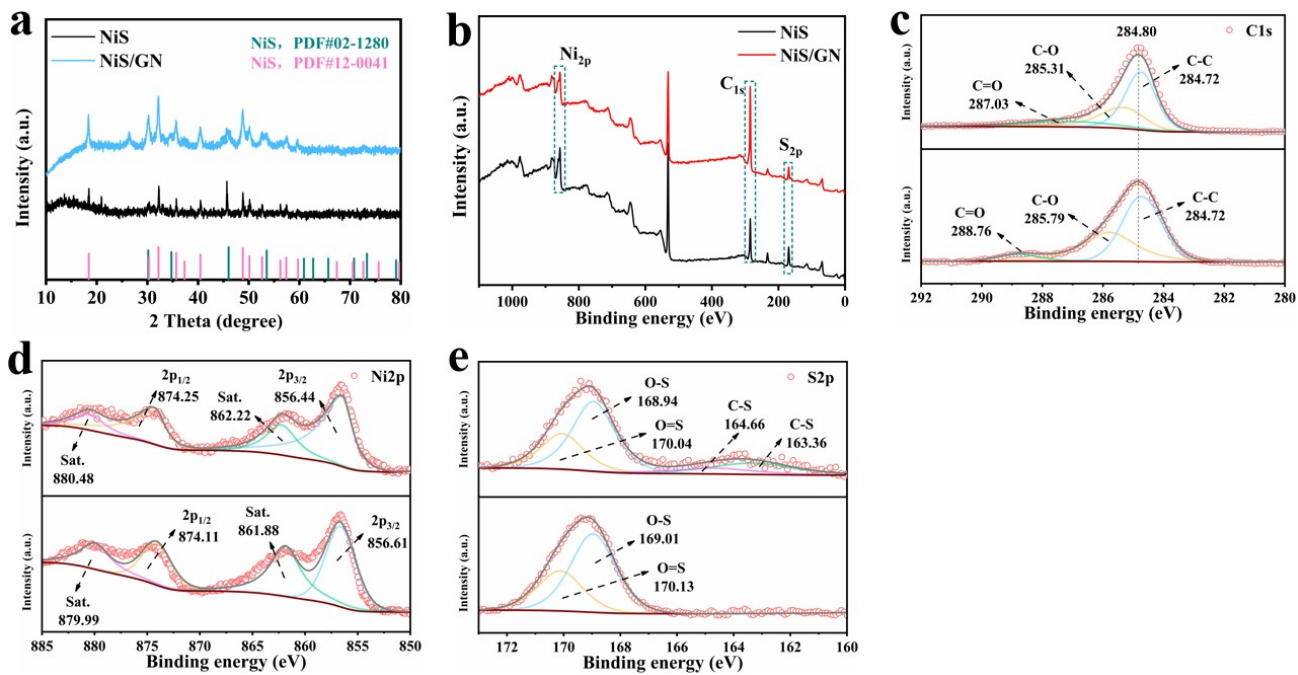

**Fig. S14.** (a) XRD patterns, and XPS spectra of NiS and NiS/GN. (b) survey spectra, (c) C 1s spectra, (d) Ni 2p spectra, and (e) S 2p spectra.

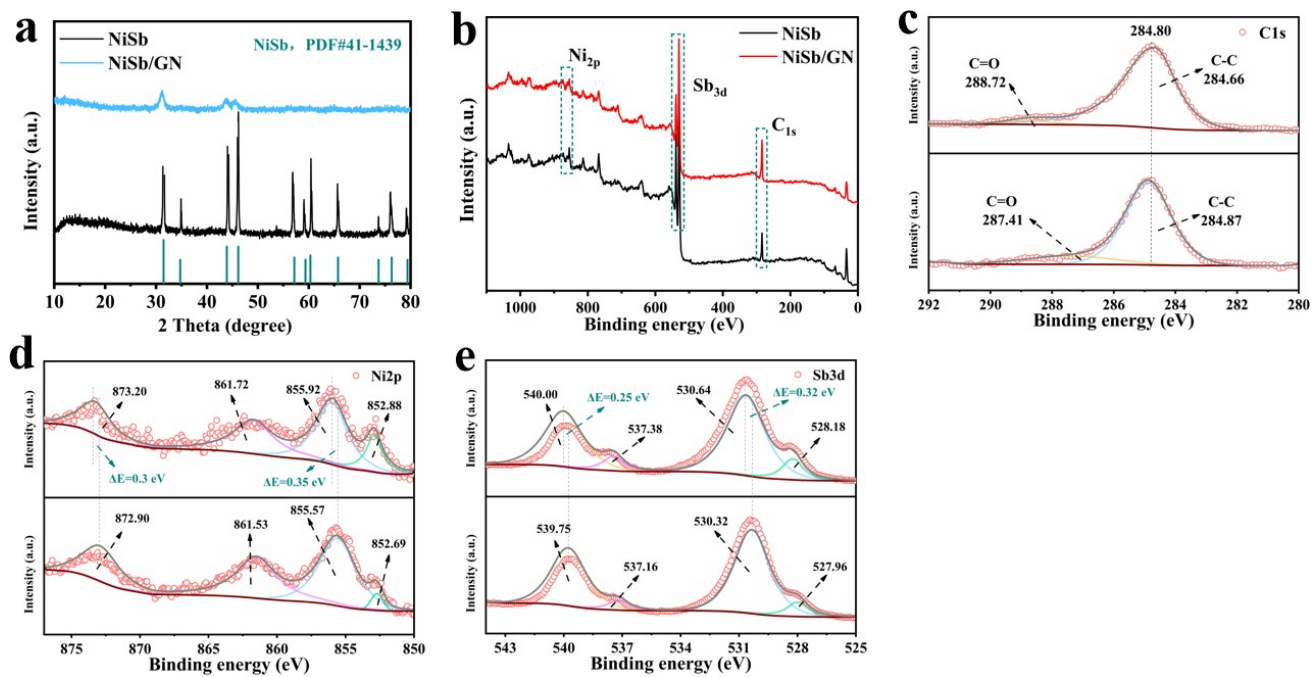

**Fig. S15.** (a) XRD patterns, and XPS spectra of NiSb and NiSb/GN. (b) survey spectra, (c) C 1s spectra, (d) Ni 2p spectra, and (e) Sb 3d spectra.



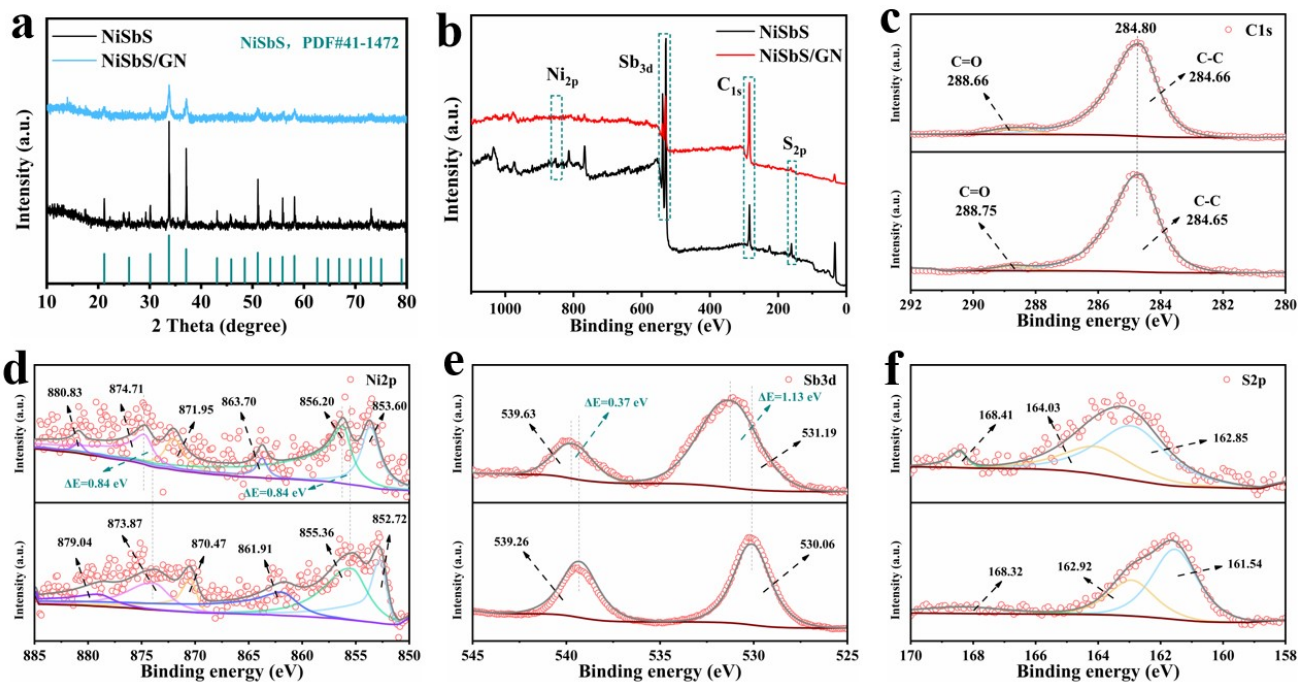

**Fig. S16.** (a) XRD patterns, and XPS spectra of NiSbS and NiSbS/GN. (b) survey spectra, (c) C 1s spectra, (d) Ni 2p spectra, (e) Sb 3d spectra, and (f) S 2p spectra.

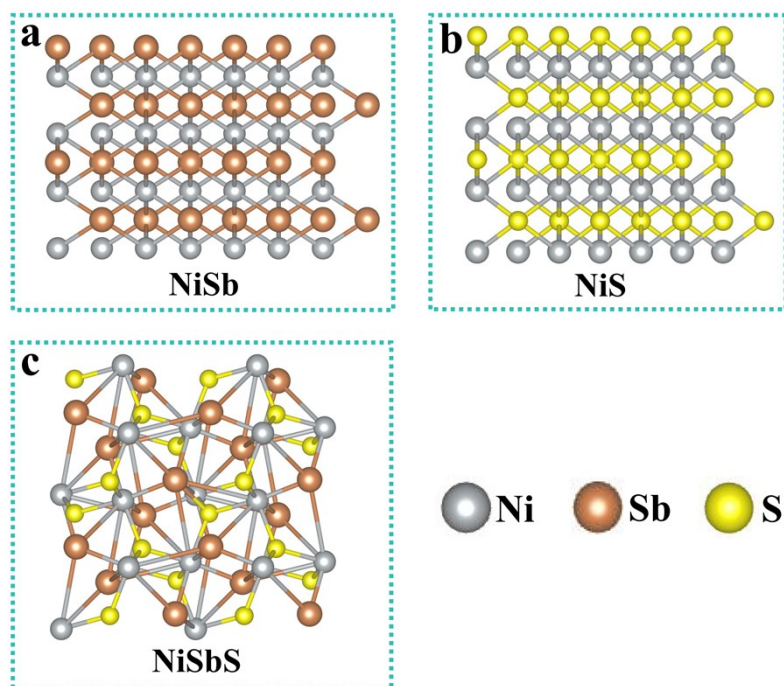

**Fig. S17.** The crystal structure of (a) NiSb, (b) NiS, and (c) NiSbS.
